# 1 The Identification of a 1916 Irish Rebel: New Approach for Estimating 2 Relatedness From Low Coverage Homozygous Genomes

3  
4 Daniel Fernandes<sup>1,2,6\*</sup>, Kendra Sirak<sup>1,3,6</sup>, Mario Novak<sup>1,4</sup>, John Finarelli<sup>5,6</sup>, John Byrne<sup>7</sup>, Edward  
5 Connolly<sup>8</sup>, Jeanette EL Carlsson<sup>5,9</sup>, Edmondo Ferretti<sup>9</sup>, Ron Pinhasi<sup>1,6</sup>, Jens Carlsson<sup>5,9</sup>

6  
7 <sup>1</sup> School of Archaeology, University College Dublin, Belfield, Dublin 4, Republic of Ireland

8 <sup>2</sup> CIAS, Department of Life Sciences, University of Coimbra, 3000-456 Coimbra, Portugal

9 <sup>3</sup> Department of Anthropology, Emory University, 201 Dowman Dr., Atlanta, GA 30322, United States of  
10 America

11 <sup>4</sup> Institute for Anthropological Research, Ljudevita Gaja 32, 10000 Zagreb, Croatia

12 <sup>5</sup> School of Biology and Environment Science, University College Dublin, Belfield, Dublin 4, Republic of  
13 Ireland

14 <sup>6</sup> Earth Institute, University College Dublin, Belfield, Dublin 4, Republic of Ireland

15 <sup>7</sup> National Forensic Coordination Office, Garda Technical Bureau, Garda Headquarters, Phoenix Park,  
16 Dublin 8, Republic of Ireland.

17 <sup>8</sup> Forensic Science Ireland, Garda Headquarters, Phoenix Park, Dublin 8, Republic of Ireland

18 <sup>9</sup> Area 52 Research Group, School of Biology and Environment Science, University College Dublin,  
19 Dublin 4, Republic of Ireland

20 \* dani.mag.fernandes@gmail.com

## 21 22 **ABSTRACT**

23 Thomas Kent was an Irish rebel who was executed by British forces in the aftermath of the Easter Rising  
24 armed insurrection of 1916 and buried in a shallow grave on Cork prison's grounds. In 2015, ninety-nine  
25 years after his death, a state funeral was offered to his living family to honor his role in the struggle for  
26 Irish independence. However, inaccuracies in record keeping did not allow the bodily remains that  
27 supposedly belonged to Kent to be identified with absolute certainty. Using a novel approach based on  
28 homozygous single nucleotide polymorphisms, we identified these remains to be those of Kent by  
29 comparing his genetic data to that of two known living relatives. As the DNA degradation found on Kent's  
30 DNA, characteristic of ancient DNA, rendered traditional methods of relatedness estimation unusable,  
31 we forced all loci homozygous, in a process we refer to as "forced homozygote approach". The results  
32 were confirmed using simulated data for different relatedness classes. We argue that this method  
33 provides a necessary alternative for relatedness estimations, not only in forensic analysis, but also in  
34 ancient DNA studies, where reduced amounts of genetic information can limit the application of  
35 traditional methods.

36

## 37 INTRODUCTION

38 Estimating the genetic relatedness of modern individuals is routinely achieved by employing the use of  
39 microsatellites (synonymous with short tandem repeats (STR)) or other genomic markers that estimate  
40 kinship coefficients based on probabilities of identity-by-descent (IBD)<sup>1,2</sup>. These methods, however,  
41 cannot be applied to cases where the DNA presents high levels of fragmentation and damage, as is  
42 common in ancient DNA (aDNA) research. Upon an organism's death, its genetic material starts to  
43 degrade and accumulate damage as repair enzymes no longer maintain the integrity of the molecular  
44 structure of DNA<sup>3,4</sup>. Among the many factors that contribute to the rate and severity of this phenomenon  
45 are temperature, the acidity of the surrounding depositional environment, ambient level of humidity,  
46 and the eventual invasion of environmental microbes into the organism's cells. As a result, DNA  
47 fragments extracted from preserved tissue (in most cases bone and teeth) that is recovered from either  
48 ancient or semi-ancient (e.g. many forensic cases) human remains, are short in length, ranging from 30  
49 to 70 base pairs. The degradation process has a major impact on the success rates and authenticity of  
50 many PCR-based ancient DNA (aDNA) identification techniques<sup>3,4,5,6</sup>, however analysis of these short and  
51 damaged DNA molecules was revolutionised with the onset of Next Generation Sequencing (NGS) one  
52 decade ago. Next-Generation shotgun sequencing has enabled aDNA studies to progress at a much faster  
53 rate than before, and when applied in conjunction with optimised bone tissue isolation, DNA extraction,  
54 and sequencing technologies, large amounts of genetic information can be obtained even from samples  
55 with poor molecular preservation.

56 Relatedness estimation is a topic of relevance and interest in both anthropological and forensic studies.  
57 Before NGS, PCR-based studies were affected by a limited capacity to authenticate aDNA results and an  
58 inability to retrieve the required data from most aDNA samples<sup>7,8,9,10</sup>. However, some methods have been  
59 adapted to work specifically with this type of NGS or ancient DNA data; these are present in software  
60 such as PLINK2<sup>11</sup> and NGSrelate<sup>12</sup>. Both software packages utilise Single Nucleotide Polymorphism (SNP)  
61 data, shown to work well with maximum likelihood approaches, and rely on genotypes, genotype  
62 likelihoods and minor allele frequencies. However, these packages require the input of relatively high  
63 amounts of genetic data (large numbers of loci) which is oftentimes challenging and expensive to obtain  
64 from ancient skeletal material<sup>1,2,12</sup>. Our method overcomes these challenges by substantially reducing  
65 the amount of input data required without sacrificing the confidence of the relatedness estimation.  
66 Here, we apply this novel method to identify the century-old skeletal remains of a famous Irish Rebel,  
67 Thomas Kent.

68 Thomas Kent (1865-1916), an Irish rebel native to Castlelyons, grew up in Bawnard House located just  
69 outside the town of Fermoy in County Cork, Ireland. A week after the Easter Rising insurrection, in April  
70 of 1916, the Royal Irish Constabulary (RIC) raided the family home on 1<sup>st</sup> May. An RIC officer was shot  
71 dead during the raid. Thomas and William Kent were arrested. Following court martial, William was  
72 acquitted, but Thomas received a death sentence and was one of 16 men executed by British Forces

73 following the Easter Rising, being executed in the early hours of the 9<sup>th</sup> of May, 1916 at Cork Detention  
74 Barracks and then buried adjacent to where he fell<sup>13</sup>.

75 The remains of Thomas Kent lay in the Barracks, which subsequently became Cork Prison, until June  
76 2015, when they were exhumed by a team led by the National Monuments Service of the Department of  
77 Arts, Heritage and the Gaeltacht. Poorly kept records from the era of Thomas Kent's execution and  
78 throughout the intervening 99 years resulted in confusion surrounding his final resting place and  
79 uncertainty in the identification of his remains. The presumed identity of the remains was solely based  
80 on circumstantial evidence, and though attempted, it was soon determined that traditional DNA analysis  
81 was not an option due to the DNA degradation that was expected to be found in his remains due to their  
82 ancient/archaeological origin. The National Forensic Coordination Office at the Garda Technical Bureau  
83 and Forensic Science Ireland contacted the University College Dublin (UCD) who developed a new DNA  
84 identification method, based on optimisation techniques involving the use of the osseous inner ear part  
85 of the petrous part of the temporal bone<sup>14</sup> which has been applied successfully for over ~1000  
86 archaeological samples from temperate regions spanning between 40,000-500 years before present  
87 (average endogenous yields range of 50-70% and with an overall success rate of ~80%<sup>15</sup>).

88 Using low-coverage shotgun sequencing data obtained from a single sequencing run on the Illumina MiSeq  
89 platform, we compared modern genetic data from two of Thomas Kent's living relatives to his  
90 century-old genetic material in order to identify his remains. Based on the success of the our analytic  
91 approach in a low-coverage data scenario, we propose a NGS shotgun SNP-based method for relatedness  
92 estimation that uses "forced homozygote" allele data to estimate relationship coefficients and is based  
93 upon a symmetrical Rxy estimator algorithm developed by Queller and Goodnight<sup>16</sup>.

94 Similar to other available software, the approach reported in this study relies on SNP data but requires a  
95 substantially lower amount of input data than the methods mentioned previously while not sacrificing  
96 any accuracy. This makes it widely applicable budget-efficient forensic applications, as well as to the  
97 rapidly-expanding field of ancient DNA studies, where other methods are not an option, because low  
98 coverage homozygous data is the norm<sup>10,15</sup>. Here we detail the success of our approach in the  
99 identification of the historical remains of the Irish revolutionary Thomas Kent.

100

## 101 **RESULTS AND DISCUSSION**

### 102 **Authentication of Sequencing Data**

103 As expected, DNA preservation differed noticeably between the modern individuals and the supposed  
104 archaeological remains of Thomas Kent (hereafter, TK). Because of that, we followed the methodologies  
105 used for ancient DNA analysis. For standardization purposes, after separate DNA extractions, which  
106 required different protocols due to the use of different biological tissues, we prepared the modern  
107 samples for sequencing in exactly the same way as TK. The average sequence read length from TK was

108 predicted to be shorter than his modern relatives (E81 and E82) due to the historic nature of this sample;  
109 average fragment length was determined to be 54.01 base pairs (bp), with a wide standard deviation of  $\pm$   
110 11.57bp (Table 1). In contrast, the modern relatives' DNA size averaged 64.48bp, with a standard  
111 deviation of  $\pm$  1.52bp, which is extremely close to the sequencing length used (65bp). During the analysis  
112 of the raw sequencing data, the presence of adapters was detected in very few reads for the modern  
113 individuals as compared to the ancient sample (38% for E81 and E82, against 72% for TK), further  
114 supporting the notion that these endogenous modern DNA fragments were longer than 65bp. This was the  
115 expected outcome for modern DNA samples, indicating that these non-damaged sequences were possibly  
116 of lengths greater than or close to 65bp. Due to the archaeological nature of Thomas Kent's genetic  
117 material and the possibility of modern DNA contamination, raw data for this sample was first analysed to  
118 confirm the authenticity of the retrieved DNA as endogenous and ancient. To authenticate the DNA of TK  
119 as ancient, we utilised a widely-used approach developed for ancient DNA that quantifies deamination  
120 frequencies at the terminal ends of the DNA molecule, looking in particular for C>T substitutions at 5'  
121 overhangs that characterize the deamination of cytosines. Using the mapDamage v 2.0 software<sup>17,18</sup>, the  
122 deamination frequencies present in TK's DNA, 0.14 C>T at the 5' end and 0.10 G>A at the 3' end (Figure  
123 1) appear consistent with the expectation of molecular degradation for century-old bones interred in a  
124 shallow grave in the presence of quicklime<sup>13</sup>. In contrast, the modern DNA from TK's living relatives did  
125 not show significant damage patterns at the ends of the sequences. However, because fragments with  
126 shorter size than that of the sequencing length (65bp) are not expected to be overwhelmingly present in  
127 modern DNA, these deamination frequencies are not informative as it is probable that the ends of the  
128 molecules were not read.

129 Mitochondrial haplogroups were also estimated for the three individuals (Table 1) using Phy-Mer<sup>19</sup>. For  
130 ethical reasons, the determined haplogroups are not reported in this paper; however, the two modern  
131 relatives, as expected, shared the same haplogroup, with a score of 0.61. This score estimates how well  
132 the given data matches the assigned haplogroup in the 0-1 interval. Thomas Kent's haplogroup was  
133 different from that of the relatives, with a score of 0.77. All three haplogroups were consistent with  
134 expectations for historic or modern individuals native to Ireland.

135

### 136 **Relatedness Estimations**

137 We estimated relatedness among the TK remains and two surviving members of the Kent family using  
138 very low coverage shotgun data (ranging from 0.04X to 0.1X) obtained from one MiSeq sequencing run,  
139 which currently generates a maximum of 25 million reads. Because we did not use a targeted enrichment  
140 or hybridization capture method to selectively identify and obtain common loci within the human  
141 genome, the output data for each individual was a random pool of overlapping reads. Along with the  
142 negative controls, these three samples were the only samples placed on the sequencing run. Thomas  
143 Kent had 25% of his total reads aligning to the human genome, representing a genomic coverage of 0.04X.

144 This amount of endogenous DNA is considered high in an ancient DNA context and was made possible to  
145 retrieve because of improved DNA extraction methodologies<sup>14, 20</sup>. Relative 1 had 4817884 total reads,  
146 with 3855705 aligning to the human genome (80% endogenous contents and 0.08X coverage) and Relative  
147 2 slightly more, 6081215 total reads, from which 4758208 were of human origin (78% endogenous  
148 contents and 0.1X coverage) (Table 1). None of the negative controls prepared along with the samples  
149 rendered human sequences. Using the dataset of SNPs developed for population and evolutionary genetic  
150 studies employed in<sup>10</sup>, we called genotypes for 354,212 positions for each individual, obtaining 17403  
151 SNPs called for TK, 34195 for Relative 1 (E81), and 42066 for Relative 2 (E82). Out of these, we extracted  
152 only the shared SNPs between each dyad: TK:E81 (1328 SNPs), TK:E82 (1592 SNPs), and E81:E82 (3480  
153 SNPs). As the total genome coverages were very low (Table 1), virtually all SNPs called had only one 1X  
154 read depth. Because we did not have more than one read per SNP position, we forced each SNP to be  
155 homozygous by repeating the called base to generate a diploid loci; this is referred to as the “forced  
156 homozygote” approach. For SNPs with more than 1X coverage, one call with phred quality above 30 was  
157 randomly selected and then “forced” homozygous by repeating the base as explained above. We  
158 estimated relationship coefficients for each of the three dyads using the Queller and Goodnight (1989)  
159 algorithm incorporated in the software SPAGeDi1-5a (build04-03-2015)<sup>21</sup>, using the correspondent  
160 European allele frequencies downloaded from the 1000 Genomes website. As anticipated, the use of the  
161 forced homozygote approach resulted in relatedness coefficients ( $R_{xy}$ ) of half the expected values. For  
162 the pair E81:E82, we observed an  $R_{xy}$  of 0.2794, consistent in modern genetics with second order  
163 relatedness, but with first order relatedness in the forced homozygote approach (i.e. equivalent to a  
164 modern genetics  $R_{xy}$  of 0.50). For TK:E81, the  $R_{xy}$  was estimated at 0.1336, and for TK:E82, it was  
165 estimated at 0.1236. These values are consistent with a second order of relatedness for uncle/niece (25%  
166 in modern genetics, or 12.5% under our forced homozygote approach) between TK and the two living  
167 relatives, supporting the positive identification of his remains.

168 The expected hypothesis that Thomas Kent was related to the two living relatives by a second order  
169 relationship and the two living relatives are related to each other by a first order relationship  
170 (Hypothesis #4, Table 2) is unambiguously supported by the data, comprising nearly the entire posterior  
171 probability of the set of hypotheses. Using the posterior probabilities, the odds that this hypothesis is  
172 incorrect given the observed data is less than one in one million (8.15 E-07). Indeed, the Odds Ratio of  
173 the summed posterior probabilities for the four hypotheses proposing that the remains of Thomas Kent  
174 are related, in any manner, to both relatives versus the odds that he is unrelated to at least one of the  
175 two is in excess of 5 trillion, indicating conclusively that the TK remains are related to the two living  
176 members of the Kent family.

177

178 ***In silico* Simulations of Relatedness**

179 In order to assess the accuracy of the relatedness estimations using forced homozygote data, we  
180 computed relatedness coefficients using the forced homozygote approach on three relatedness classes -  
181 unrelated individuals, first order, and second order, on two different sets of data.

182 First, we randomly generated SNP data for a total of 2000 virtual pairs of individuals using allele  
183 frequencies of the shared SNPs of each of the three possible dyads - TK:E81, TK:E82, E81:E82. For each  
184 of these combinations, 2000 unrelated individuals, 2000 full siblings (first order), and 2000 half siblings  
185 (second order) were simulated, their relatedness coefficients calculated in SPAGeDI, and the distribution  
186 visualised, as shown in Figure 2 (details in the Methods section). The peaks of the curves are at the  
187 expected half-values of the relationship coefficients and it is clear that the results obtained for the three  
188 relative pairs fall within the expected ranges of variation.

189 We then applied the same approach for three pairs of samples of known relatedness from the 1000  
190 Genomes Project (Table 3), by choosing a pair for each order to test. We randomly downsized each  
191 sample to approximately 50,000 SNPs and then ran the simulations for the shared SNPs between each  
192 dyad. The number of common SNPs varied from 2040 to 2307, which is in between the values shared by  
193 TK and relatives, and one relative and another. The relatedness coefficients for each pair were  
194 calculated using exactly the same “forced homozygote” approach and then six hundred estimations per  
195 order or relatedness were simulated. These were plotted using the correspondent frequencies of the  
196 common SNPs, showing that the coefficients for each pair match their known order of relatedness  
197 (Figure 3).

198 An R script with two sets of functions (TKrelated and CyBRSex) was developed to automate the two  
199 processes: simulations down to a true coefficient of relationship of 25%, and actual data tests. By using  
200 data in PLINK format as input, our package either runs SPAGeDI for the desired pairs of individuals, or  
201 generates X number of homozygous individuals for the given set of SNPs and their allele frequencies. A  
202 function allows to plot the three coefficients of relatedness used for simulations (0%, 25%, 50%), making  
203 it possible to visualise the distribution of simulated relatedness estimates for any given relatedness class  
204 with the expected ranges of variation from the specific input SNP data. The tests on pairs of individuals  
205 are performed by a function that requires two input files and an allele frequency file.

206 This package is freely available under the GNU General Public License v3 at  
207 <https://github.com/danimag/tkrelated> and includes a detailed walkthrough manual.

208

## 209 **CONCLUSIONS**

210 A unique interdisciplinary research opportunity on this historical matter has allowed us to develop an  
211 efficient and accurate method for relatedness estimations using small amounts of genetic data. We were  
212 able to identify the skeletal remains of Thomas Kent, whose state funeral took place on the 18<sup>th</sup> of  
213 September of 2015, shortly after the identification of his remains. Applicable to both forensic and

214 ancient DNA research, our method for relatedness estimation has important additional benefits in  
215 contrast to existing methods. When compared to the software packages PLINK and NGSrelate, the  
216 approach we present here requires substantially lower genomic coverage, which will prove helpful when  
217 large amounts of genomic data are unavailable, such as in the case of ancient DNA studies. In a situation  
218 similar to ours, Korneliussen and Moltke<sup>12</sup>, show that using the software NGSrelate to estimate  
219 relatedness based on a coverage of 1X results in large variance of relatedness estimates, yet it still  
220 performs better than PLINK. As we have shown, our method was effective with coverages ranging from  
221 0.04X to 0.1X, an order of magnitude reduction on the amount of genetic data required. We also have  
222 designed an R script to simulate virtual groups of (un)related individuals and their relatedness  
223 coefficients, based on Queller and Goodnight's  $r_{xy}$ , from a given set of SNPs and corresponding allele  
224 frequencies. This should prove useful in ancient DNA, where low endogenous DNA contents are often the  
225 norm and where target enrichment approaches for SNP capture are becoming more common. With the  
226 implementation of the “forced homozygote” method, estimating the relatedness between individuals in  
227 contexts such as multiple or mass burials may become a more routine task in future studies. This will  
228 benefit research in archaeology and anthropology, where the relationships of individuals found interred  
229 in multiple burials are often only hypothesized.

230

## 231 **MATERIALS AND METHODS**

### 232 **Archaeological Bone Sampling**

233 To obtain genetic material from the skeletal remains of Thomas Kent, fine bone powder was retrieved  
234 from the cochlea of the left petrous part of the temporal bone that was detached from the rest of the  
235 cranium. While the petrous part of the temporal bone is accepted as yielding systematically higher  
236 endogenous DNA compared to other skeletal elements<sup>20</sup>, the cochlea in particular was chosen because of  
237 research that demonstrated that the otic capsule, and particularly the cochlea, provides the highest  
238 endogenous DNA yield from any part of the petrous<sup>14</sup>. The powder was obtained using a  
239 minimally-destructive direct drilling technique developed at University College Dublin aimed at reducing  
240 any possible damage to the bone. A Dremel 9100 Fortiflex rotary tool, fitted with a small-sized spherical  
241 grinding bit (1.5mm) previously treated with bleach and ethanol, was set to medium speed and used to  
242 obtain approximately 100mg of bone powder. The cochlea was accessed from the superior aspect of the  
243 petrous bone, limiting visible damage to a 2-3mm hole on the superior surface of the petrous. The bone  
244 powder generated from drilling the cochlear cavern was collected in a clean weighing boat and  
245 transferred to a 1.5mL sterile Eppendorf tube. This procedure was conducted in a clean sample  
246 preparation facility at UCD.

247

## 248 **Blood Sampling and DNA Extraction for Modern Relatives**

249 Blood samples were collected from Thomas Kent's living relatives in accordance with the prescribed  
250 methods employed by Forensic Science Ireland in the investigation of any unidentified remains. DNA  
251 extracts were then sent to University College Dublin for further processing. Informed consent was  
252 obtained by the Gardaí for the genetic analysis of this biological material.

253

## 254 **DNA Extraction for Thomas Kent**

255 DNA was extracted from Thomas Kent's bone powder following the protocol from<sup>22</sup> which improves upon  
256 the optimized silica-based extraction technique described in<sup>6</sup>. Extraction took place in a physically  
257 separated ancient DNA lab at UCD in adherence with stringent anti-contamination protocols.

258 Approximately 50mg of bone powder was combined with 1mL of an extraction buffer solution containing  
259 0.5M EDTA and Proteinase K (Roche Diagnostics). The bone powder was suspended by vortexing and  
260 incubated at 37°C with rotation for 18 hours in a ThermoMixer C (Eppendorf AG) and subsequently  
261 centrifuged for 2 minutes at 17,000 g in a Heraeus Pico 17 microcentrifuge (Thermo Scientific) to  
262 separate the undissolved bone from the supernatant solution. The supernatant solution was collected  
263 and added to 13mL of binding buffer solution containing guanidine hydrochloride (MW 95.53, 5M),  
264 isopropanol, Tween-20 (10%), and sodium acetate (3M) in a custom-made binding apparatus. This binding  
265 apparatus was constructed by forcibly fitting a reservoir removed from a Zymo-Spin V column (Zymo  
266 Research) into a MinElute silica spin column (Qiagen). This apparatus was then placed into a 50mL falcon  
267 tube<sup>22</sup>. The 14mL solution of binding buffer and DNA extract was added to the extension reservoir in the  
268 falcon tube, the cap was secured, and the falcon tube was centrifuged for 4 minutes at 2500rpm, rotated  
269 90°, and centrifuged for another 2 minutes at 3,000rpm. The extension reservoir was then disassembled  
270 and the MinElute column was placed into a 2mL collection tube. The column was dry-spun for 1 minute at  
271 13,300rpm, and two wash steps were subsequently performed using 650µL of PE wash buffer. Finally, the  
272 column was placed into a clean 1.5mL Eppendorf tube and the DNA was eluted into 25µL of TET buffer.

273

## 274 **DNA Library Preparation**

275 Libraries for next-generation sequencing were built for all three DNA extracts using a modified version of  
276<sup>23</sup> as outlined in<sup>20</sup>, where blunt end repair was performed using NEBNext End-Repair (New England  
277 Biolabs Inc.) and Bst was inactivated by heat (20 minutes at 80°C). Thomas Kent's DNA library was  
278 prepared in a dedicated ancient DNA lab whereas the libraries for the DNA of two modern relatives were  
279 prepared in a modern DNA lab in UCD Earth Institute's Area 52. Indexing PCRs were performed with  
280 AccuPrime Pfx Supermix (Life Technology), with primer IS4 and an indexing primer. 3µL of the indexed  
281 library was added to 21µL of freshly prepared PCR mix, and combined with 1µL of unique index, enabling  
282 the pooling of samples for multiplex sequencing. This resulted in a final volume of 25µL. PCR



283 amplification was performed using the following temperature cycling profile: 5 minutes at 95°C, 12  
284 cycles of 15 sec at 95°C, 30 sec at 60°C, and 30 sec at 68°C, and a final period of 5 minutes at 68°C. PCR  
285 reactions were then purified using MinElute PCR Purification Kit (Qiagen), following the manufacturer's  
286 instructions. Assessment of the PCR reactions were performed on the Agilent 2100 Bioanalyzer following  
287 the guidelines of the manufacturer. Based on the concentrations indicated by the Bioanalyzer, samples  
288 were pooled in equimolar ratios for sequencing.

289

## 290 **Next-Generation Sequencing**

291 Libraries were sequenced on an Illumina MiSeq platform at the UCD Conway Institute of Biomolecular and  
292 Biomedical Research using 65 base pair (bp) single-end sequencing.

293

## 294 **Bioinformatics Analysis**

295 A custom ancient DNA bioinformatics pipeline written by the Pinhasi Lab was applied for processing short  
296 length raw MiSeq data. The software cutadapt v1.5<sup>24</sup> was used to trim adapter sequences. Minimum  
297 overlap was set to 1 (-O 1) and minimum length to 17bp (-m 17). Alignment to the human reference  
298 genome (hg19, GRCh37) was processed by the Burrows-Wheeler Aligner v.0.7.5a-r405<sup>25</sup> with disabled  
299 seed (-l 1000) and filtering for reads with a minimum phred quality score of 30. Duplicated sequences  
300 were removed using samtools v0.1.19-96b5f2294a<sup>26</sup>. To assess the authenticity of Thomas Kent's DNA as  
301 ancient, damage patterns were assessed using the mapDamage v.2.0.6 tool<sup>18</sup>.

302 Single nucleotide polymorphisms were called using the Genome Analyzer Tool Kit's (GATK)  
303 v.3.3-0-g37228af Pileup tool for the 354,212 positions present in the Harvard's "Fully public genotype  
304 dataset" described in<sup>10</sup>.

305

## 306 **Relatedness Analysis**

307 Most loci were represented by 1X reads, and this low read depth prevented identification of  
308 heterozygote loci for the vast majority of SNP loci in all three analysed individuals, although some loci  
309 had greater coverage. These results are the norm in ancient DNA studies, and so we proceeded according  
310 to the established protocols. To be able to fully leverage the set of SNP loci, we modeled relatedness on  
311 a sample of single-read loci. For loci with greater read depth, we randomly selected one representative  
312 allele to reduce the bias that might have been introduced by allowing for some heterozygote loci. By  
313 ensuring that all loci contained only one allele we forced a "homozygote" structure on the data. This will  
314 necessarily impact the Queller & Goodnight coefficient, as only half the genome is being interrogated,  
315 reducing the anticipated relatedness between dyads by a factor of one-half (i.e, reducing first order  
316 relationships from 0.5 to 0.25 and second order relationships from 0.25 to 0.125).

317

318 *Thomas Kent Simulations*

319 We reduced the list of genotyped loci to only those loci shared for each dyad (i.e, Thomas Kent and  
320 Relative1, Thomas Kent and Relative2, Relative1 and 2). European allele frequencies at the shared loci  
321 for each comparison were retrieved from the 1000 genomes project (release 20100804  
322 <http://www.1000genomes.org/>) using tabix (<http://www.htslib.org/doc/tabix.html>), and these were  
323 used as the reference frequencies for estimating degree of relatedness (symmetrical Rxy estimator,  
324 Queller and Goodnight 1989) using SPAGeDi1-5a (build04-03-2015)<sup>21</sup>. This was done using the TKrelated  
325 set of functions in the R package developed for this project/approach (detailed walkthrough at  
326 <https://github.com/danimag/tkrelated>). This function reads sample and allele frequencies data in  
327 non-binary text PLINK format, \*.ped/map, and \*.frq, respectively. It then makes that data  
328 SPAGeDI-ready, and runs the estimations. It also exports some files that can be used for the virtual  
329 simulations.

330 For the three dyads of relatedness comparison (Thomas Kent and Relative1, Thomas Kent and Relative2,  
331 Relative1 and 2), we simulated nine data sets, each with 2000 virtual pairs of full siblings (first order),  
332 half siblings (second order) or unrelated individuals, using the observed alleles held in common for the  
333 each of the comparisons and the correspondent European allele frequencies (release 20100804  
334 <http://www.1000genomes.org/>). Within the R package, the set of functions CybRsex take these allele  
335 frequencies and generate a desired number of pairs of unrelated individuals, first order relatives, and  
336 second order relatives. Each function for each order of relatedness starts by generating random  
337 unrelated individuals based on the frequencies of the SNPs from the input file. For first order, it pairs  
338 these unrelated individuals and produces one offspring from their homozygous genotypes. The same  
339 approach is followed for second order simulations, pairing the common parent with a new unrelated  
340 individual. For each simulated data set, we forced the same homozygote condition, resulting in a  
341 comparable set of loci represented by one allele. We assessed the degree of relatedness for the  
342 simulated data sets with SPAGeDi1-5a. The output relatedness coefficient for each simulated data set  
343 was tabulated to create an empirical distribution for three degrees of relatedness (first order, second  
344 order, unrelated) for the particular set of loci observed to be held in common for the three subjects.

345 The distribution of relatedness coefficients was nearly normal (Figure 2). Using mean and variance  
346 parameters fit to the empirical distributions, we calculated maximum likelihood (ML) fits of the observed  
347 degree of relatedness for each dyad to the three relatedness distributions<sup>27,28</sup>. Potential relatedness  
348 hypotheses constitute the set of potential combinations of full sibling/parental and half sibling/uncle  
349 between the three subjects, producing a set of eleven potential hypotheses (Table 2). The ML fit of each  
350 hypothesis is then the sum of the ML fits of the observed relatedness coefficient between the two  
351 individuals for the appropriate empirical distribution.

352

353 *1000 Genomes Simulations*

354 To test the robustness of our approach, we applied it to three pairs of individuals with know relatedness  
355 from the 1000 Genomes Project. Since related individuals are excluded in Phase 3, we downloaded the  
356 variant calls from Phase 1 for all chromosomes (release 20101123 from  
357 <http://www.internationalgenome.org/data>, accessed on 27/09/2016). Using PLINK v.1.90b3.41<sup>11</sup> we  
358 converted and merged the data. We selected the individuals shown in Table 3. They were isolated from  
359 the dataset, randomly sub-sampled to around 50.000 SNPs, and we then ran our script for estimating  
360 relatedness and simulating individuals. As our approach has been designed to be used with samples from  
361 very low-coverage scenarios such as in ancient DNA studies, we ran these tests with approximately 2000  
362 SNPs and 600 simulations. We retrieved allele frequencies from the populations from where each pair of  
363 individuals was originated, i.e. for the second order test on a pair of individuals originating from Great  
364 Britain we used the allele frequencies of that same population. The results of these simulations confirm  
365 the robustness of our approach when dealing with low-coverage data (Figure 3).

366

367 **ETHICS STATEMENT**

368 The investigation into the authentication of Thomas Kent's remains was tasked to the Irish Police, An  
369 Garda Siochana, on behalf of the State, and therefore obliged to adhere to specific ethical and legal  
370 considerations.

371 Informed consent was obtained when collecting the blood from Thomas Kent's living relatives in regard to  
372 analysis of the genetic data and dissemination of the results. Kent's remains, legally considered  
373 archaeological, were handled with the permission of the correspondent legal authorities

374 The request for assistance from UCD by An Garda Siochana to identify the remains recovered from Cork  
375 Prison in early 2015 was made to progress that element of the overall investigation.

376 An Garda Siochana are tasked with such investigations, on behalf of the State, and do not require an  
377 ethics committee to initiate enquiries. An Garda Siochana may enlist the expertise of any agency or  
378 academic entity to pursue lines of enquiry, and such was the case with UCD.

379 In this case, the original request for help in identifying the remains came from the Department of An  
380 Taoiseach (Head of Government) to the National Forensic Coordination Office, who then managed the  
381 overall investigation. The integrity of all evidence, samples and results was managed by the Head of the  
382 National Forensic Coordination Office, who was also the investigating officer in this case. All ethical  
383 considerations and legal obligations under the Data Protection Acts were his responsibility as  
384 Investigating Officer, and he was the person who sought the assistance of UCD on behalf of An Garda  
385 Siochana. He reviewed all evidence or results before they were communicated to the relevant parties. In

386 such investigations ethical considerations form part of the overall review, in addition to many layers of  
387 legal consideration and all requirements were met.

388

#### 389 **DATA AVAILABILITY**

390 The genetic data from the study has been stored in the repository of the National Forensic Coordination  
391 Office of An Garda Siochana, and although it is of public access, legal considerations require that it  
392 complies with the Data Protection Act, making it restricted. The data will be available from the Police  
393 repository by request, under the reference number NFCO-01-244103/15. The following email can be used  
394 forensic.coordination@garda.ie.

395

#### 396 **ACKNOWLEDGEMENTS**

397 We would like to thank Dr. Sudipto Das for his comments on sequencing methods; Dr. Eppie Jones for  
398 comments on the manuscript; the Irish Government for their support throughout the Thomas Kent  
399 identification process; and Dr. Olivia Cheronet for helping with the R script. This research was supported  
400 by R.P.'s European Research Council Starting grant ERC- 2010-StG 263441 (<https://erc.europa.eu>). D.F.  
401 was supported by an Irish Research Council Post-Graduate grant GOIPG/2013/36 ([www.research.ie](http://www.research.ie)).

402

#### 403 **AUTHOR CONTRIBUTIONS**

404 D.F., J.C, K.S., M.N. and R.P. designed the experiments. D.F., E.C., J.E.C, K.S. and M.N. carried the  
405 experimental work. D.F., E.F., J.C., J.F. and K.S. analysed the data. D.F., J.B., J.C., J.F and K.S. wrote  
406 the manuscript. Tables and Figures were created by D.F.

407

#### 408 **COMPETING FINANCIAL INTERESTS**

409 The authors declared no competing financial interests.

410 REFERENCES

- 411 1. Powell, J. E., Visscher, P. M. & Goddard, M. E. Reconciling the analysis of IBD and IBS in complex  
412 trait studies. *Nat Rev Genet* **11**, 800-805 (2010).
- 413 2. Speed, D. & Balding, D. J. Relatedness in the post-genomic era: is it still useful? *Nat Rev Genet*  
414 **16**, 33-44 (2015).
- 415 3. Pääbo, S. Ancient DNA: extraction, characterization, molecular cloning, and enzymatic  
416 amplification. *Proceedings of the National Academy of Sciences* **86**, 1939-1943 (1989).
- 417 4. Mitchell, D., Willerslev, E. & Hansen, A. Damage and repair of ancient DNA. *Mutation*  
418 *Research/Fundamental and Molecular Mechanisms of Mutagenesis* **571**, 265-276 (2005).
- 419 5. Willerslev, E. *et al.* Long-term persistence of bacterial DNA. *Current Biology* **14**, R9-R10 (2004).
- 420 6. Rohland, N. & Hofreiter, M. Ancient DNA extraction from bones and teeth. *Nat. Protocols* **2**,  
421 1756-1762 (2007).
- 422 7. Baca, M., Doan, K., Sobczyk, M., Stankovic, A. & Węgleński, P. Ancient DNA reveals kinship burial  
423 patterns of a pre-Columbian Andean community. *BMC Genetics* **13**, 1-11 (2012).
- 424 8. Deguilloux, M. F. *et al.* Ancient DNA and kinship analysis of human remains deposited in  
425 Merovingian necropolis sarcophagi (Jau Dignac et Loirac, France, 7th-8th century AD). *Journal of*  
426 *Archaeological Science* **41**, 399-405 (2014).
- 427 9. Dudar, J. C., Waye, J. S. & Saunders, S. R. Determination of a kinship system using ancient DNA,  
428 mortuary practice, and historic records in an upper Canadian pioneer cemetery. *International*  
429 *Journal of Osteoarchaeology* **13**, 232-246 (2003).
- 430 10. Haak, W. *et al.* Massive migration from the steppe was a source for Indo-European languages in  
431 Europe. *Nature* **522**, 207-211 (2015).
- 432 11. Chang, C. C. *et al.* Second-generation PLINK: rising to the challenge of larger and richer datasets.  
433 *GigaScience* **4**, 1-16 (2015).
- 434 12. Korneliussen, T. S. & Moltke, I. NgsRelate: a software tool for estimating pairwise relatedness  
435 from next-generation sequencing data. *Bioinformatics* **31**, 4009-4011 (2015).
- 436 13. Barton, B. *The Secret Court Martial Records of the Easter Rising*. (The History Press Ireland,  
437 2010).
- 438 14. Pinhasi, R. *et al.* Optimal Ancient DNA Yields from the Inner Ear Part of the Human Petrous Bone.  
439 *PloS one* **10**, e0129102 (2015).
- 440 15. Mathieson, I. *et al.* Genome-wide patterns of selection in 230 ancient Eurasians. *Nature* **528**,  
441 499-503 (2015).

- 442 16. Queller, D. C. & Goodnight, K. F. Estimating relatedness using genetic markers. *Evolution* **43**,  
443 258-275 (1989).
- 444 17. Ginolhac, A., Rasmussen, M., Gilbert, M. T. P., Willerslev, E. & Orlando, L. mapDamage: testing  
445 for damage patterns in ancient DNA sequences. *Bioinformatics* **27**, 2153-2155 (2011).
- 446 18. Jónsson, H., Ginolhac, A., Schubert, M., Johnson, P. L. F. & Orlando, L. mapDamage2.0: fast  
447 approximate Bayesian estimates of ancient DNA damage parameters. *Bioinformatics* **29**,  
448 1682-1684 (2013).
- 449 19. Navarro-Gomez, D. *et al.* Phy-Mer: a novel alignment-free and reference-independent  
450 mitochondrial haplogroup classifier. *Bioinformatics* **31**, 1310-1312 (2015).
- 451 20. Gamba, C. *et al.* Genome flux and stasis in a five millennium transect of European prehistory.  
452 *Nature communications* **5**, 5257 (2014).
- 453 21. Hardy, O. J. & Vekemans, X. spagedi: a versatile computer program to analyse spatial genetic  
454 structure at the individual or population levels. *Molecular Ecology Notes* **2**, 618-620 (2002).
- 455 22. Dabney, J. *et al.* Complete mitochondrial genome sequence of a Middle Pleistocene cave bear  
456 reconstructed from ultrashort DNA fragments. *Proceedings of the National Academy of Sciences*  
457 **110**, 15758-15763 (2013).
- 458 23. Meyer, M. & Kircher, M. Illumina sequencing library preparation for highly multiplexed target  
459 capture and sequencing. *Cold Spring Harbor protocols* **2010**, pdb prot5448 (2010).
- 460 24. Martin, M. Cutadapt removes adapter sequences from high-throughput sequencing reads. *2011*  
461 **17**, 10-12 (2011).
- 462 25. Li, H. & Durbin, R. Fast and accurate short read alignment with Burrows-Wheeler transform.  
463 *Bioinformatics* **25**, 1754-1760 (2009).
- 464 26. Li, H. *et al.* The Sequence Alignment/Map format and SAMtools. *Bioinformatics* **25**, 2078-2079  
465 (2009).
- 466 27. Edwards, A. W. F. *Likelihood: Expanded Edition*. (The Johns Hopkins University Press, 1992).
- 467 28. Royall, R. M. *Statistical Evidence: A Likelihood Paradigm*. (Chapman and Hall, 1997).
- 468
- 469
- 470

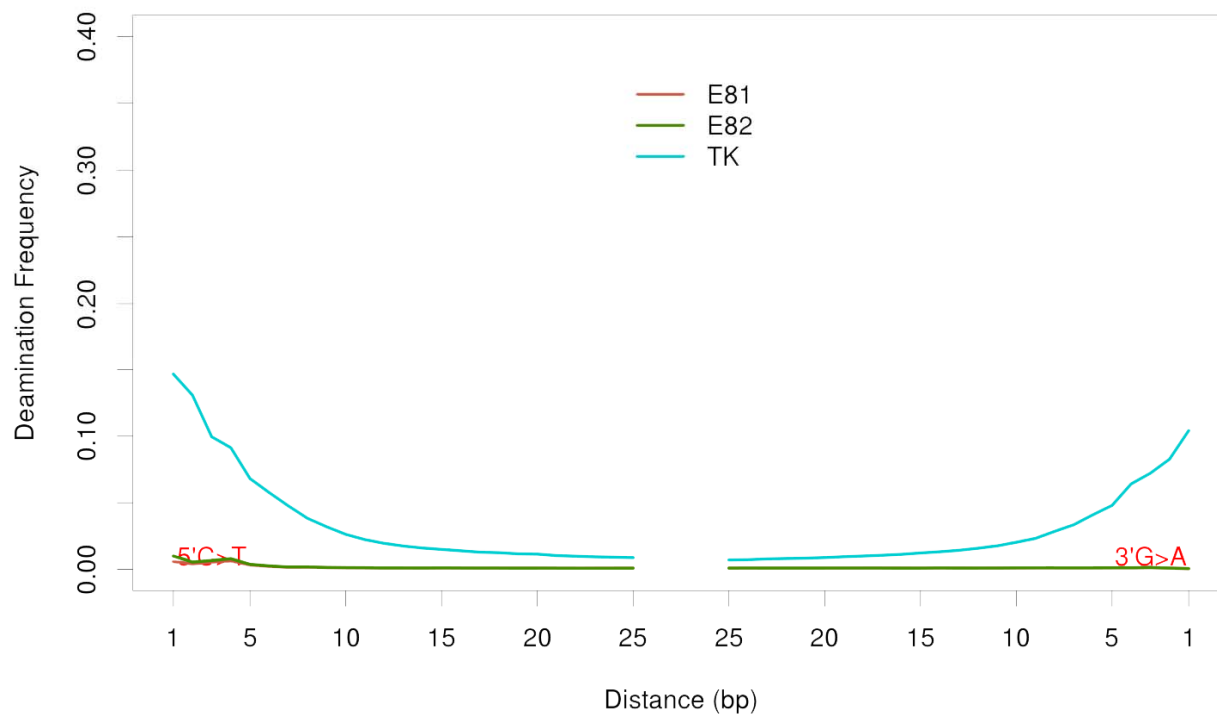

471

472

**Figure 1: DNA damage patterns from deamination frequencies of terminal bases.**

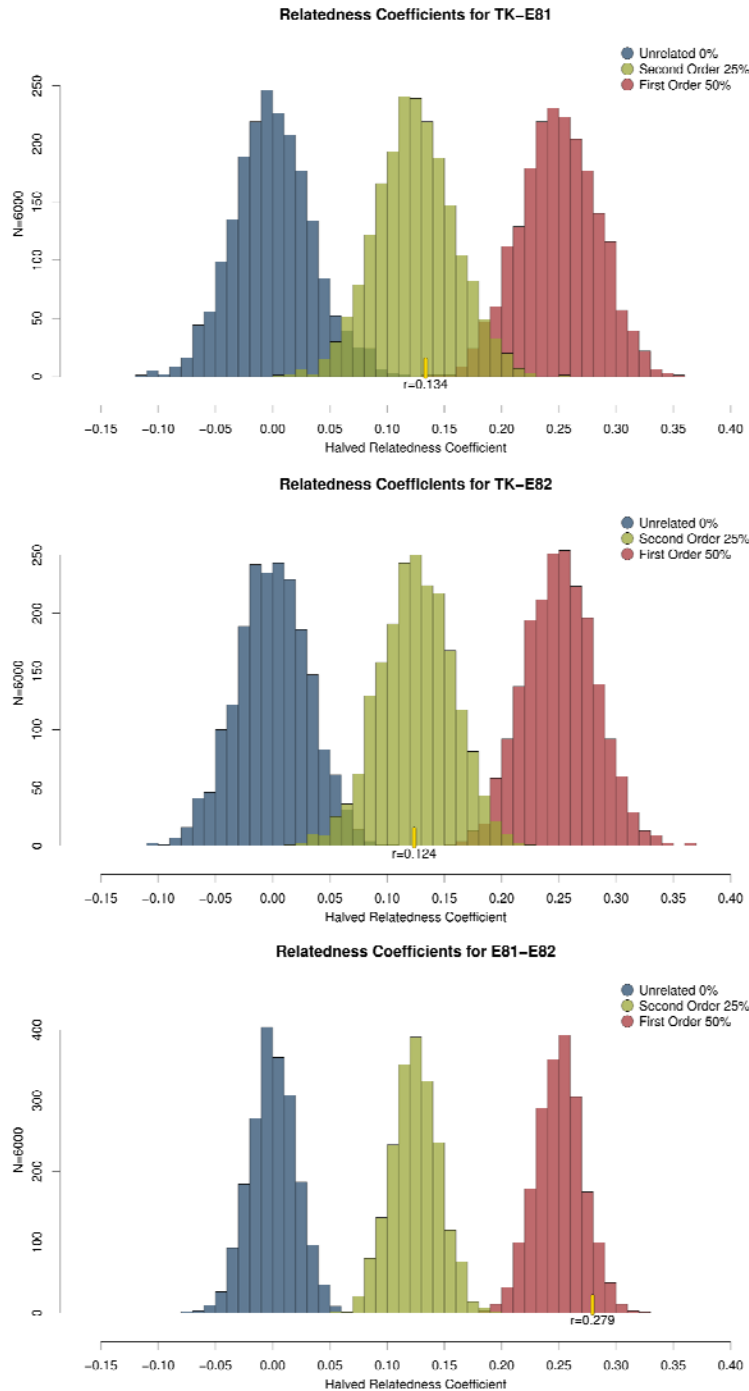

473

474 **Figure 2: Relatedness coefficients' distribution for Thomas Kent's virtual dyads.** "Forced  
475 homozygote" relatedness coefficients of computer generated individuals calculated using SPAGeDI1-5a,  
476 based on minor allele frequencies of the SNPs common to the pairs TK-E81, TK-E82, E81-E82.  
477 Blue-Unrelated, Green-Second Order, Red-First Order. Yellow lines and r values indicate the halved  
478 "forced homozygote" relatedness coefficients found for each pair.



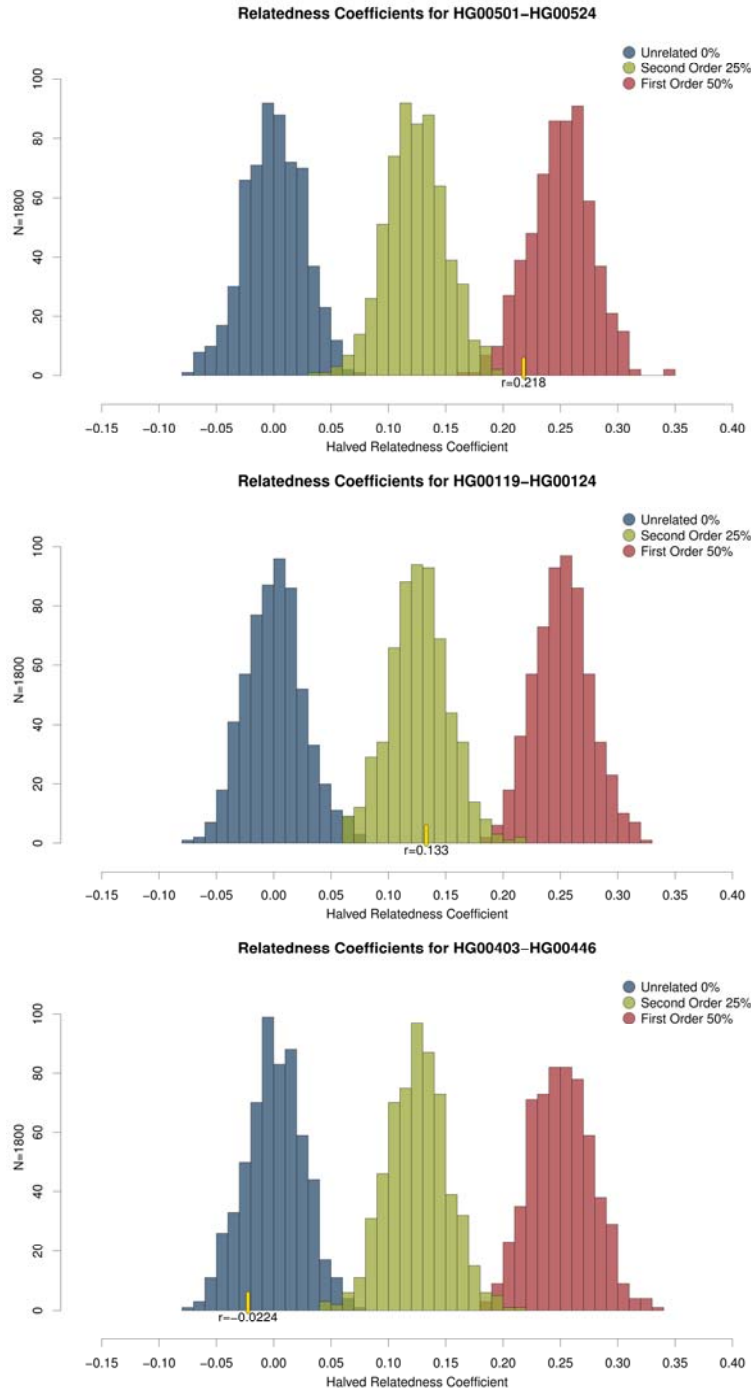

479

480 **Figure 3: Relatedness coefficients' distribution for the 1000 Genomes Project virtual dyads.** “Forced  
481 homozygote” relatedness coefficients of computer generated individuals calculated using SPAGeDI1-5a,  
482 based on minor allele frequencies of the SNPs common to the pairs HG00501-HG00524,  
483 HG00119-HG00124, and HG00403-HG00446. Blue-Unrelated, Green-Second Order, Red-First Order.  
484 Yellow lines and r values indicate the halved “forced homozygote” relatedness coefficients found for  
485 each pair.

| Individual                    | TK                      | E81                       | E82                       |
|-------------------------------|-------------------------|---------------------------|---------------------------|
| Total reads                   | 9168617                 | 4817884                   | 6081215                   |
| Trimmed reads                 | 6603060                 | 1805684                   | 2335337                   |
| Aligned reads <b>after QC</b> | 2359538                 | 3855705                   | 4758208                   |
| Endogenous (%)                | 25.73                   | 80.03                     | 78.24                     |
| GC content (%)                | 37                      | 40                        | 40                        |
| Average bp size (stdv)        | 54.01 +- 11.57          | 64.48 +- 1.52             | 64.48 +- 1.45             |
| MapDamage 5'   3'             | 0.14   0.10             | N/A   N/A                 | N/A   N/A                 |
| Molecular sex                 | Male                    | Female                    | Female                    |
| Coverage                      | 0.04X                   | 0.08X                     | 0.1X                      |
| SNPs*1                        | 17403                   | 34195                     | 42066                     |
| Common SNPs                   | E81-1328 / E82-1592     | TK-1328 / E82-3840        | TK-1592 / E81-3480        |
| mt Haplogroup (score)         | $\alpha 1^{*2}$ (0.77)  | B5 $\gamma 2^{*2}$ (0.61) | B5 $\gamma 2^{*2}$ (0.61) |
| Relatedness coefficients      | E81-0.1336 / E82-0.1236 | TK-0.1336 / E82-0.2794    | TK-0.11236 / E81-0.2794   |

\*1 From<sup>10</sup>

\*2 Real haplogroup information is not shown due to ethical constraints

486

487

Table 1: Sequencing data analysis and relatedness coefficient results.

488

| Hypothesis # | TK - E81  | TK - E82  | E81 - E82    | Model LnL | Posterior Probability |
|--------------|-----------|-----------|--------------|-----------|-----------------------|
| <b>1</b>     | Unrelated | Unrelated | Unrelated    | -99.3158  | 4.6096 E-48           |
| <b>2</b>     | Unrelated | Unrelated | Full Sibling | -5.58593  | 2.3444 E-07           |
| <b>3</b>     | Unrelated | Unrelated | Half Sibling | -32.6766  | 4.0244 E-19           |
| <b>4</b>     | Uncle     | Uncle     | Full Sibling | 9.680128  | 0.9999                |
| <b>5</b>     | Parent    | Parent    | Full Sibling | -4.6796   | 5.8030 E-07           |
| <b>6</b>     | Parent    | Uncle     | Half Sibling | -23.3091  | 4.7092 E-15           |
| <b>7</b>     | Uncle     | Parent    | Half Sibling | -25.8717  | 3.6312 E-16           |
| <b>8</b>     | Parent    | Unrelated | Unrelated    | -97.7177  | 2.2789 E-47           |
| <b>9</b>     | Uncle     | Unrelated | Unrelated    | -91.8191  | 8.3072 E-45           |
| <b>10</b>    | Unrelated | Parent    | Unrelated    | -100.008  | 2.3079 E-48           |
| <b>11</b>    | Unrelated | Uncle     | Unrelated    | -91.5465  | 1.0910 E-44           |

489

Table 2: Set of potential relatedness hypotheses for the combinations of full sibling/parental and half sibling/uncle between the three subjects.

491

492

| <b>Population</b> | <b>Coriell<br/>Sample ID</b> | <b>SRA Accession<br/>Number</b> | <b>Sex</b> | <b>Known<br/>Relatedness</b> |
|-------------------|------------------------------|---------------------------------|------------|------------------------------|
| CHS               | HG00501                      | SRS008629                       | female     | First order                  |
| CHS               | HG00524                      | SRS008634                       | male       |                              |
| GBR               | HG00119                      | SRS008504                       | male       | Second<br>Order              |
| GBR               | HG00124                      | SRS008508                       | female     |                              |
| CHS               | HG00403                      | SRS008598                       | male       | Unrelated                    |
| CHS               | HG00446                      | SRS006919                       | female     |                              |

493

494 Table 3: Information on the samples from the 1000 Genomes Project used for testing of the forced  
495 homozygote approach.

496
